# Supplementary material
Source: publisher figshare collection journal article supplement (https://wiley.figshare.com/articles/dataset/_/6707081)

## Supplementary Figure 1

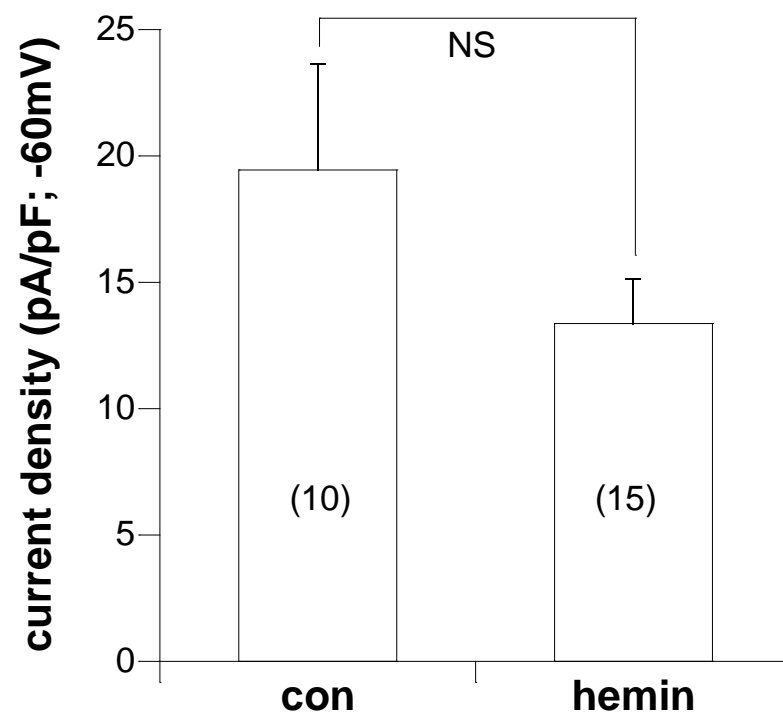

Supplement: Supplementary file 1 [file 1]

Supplementary data

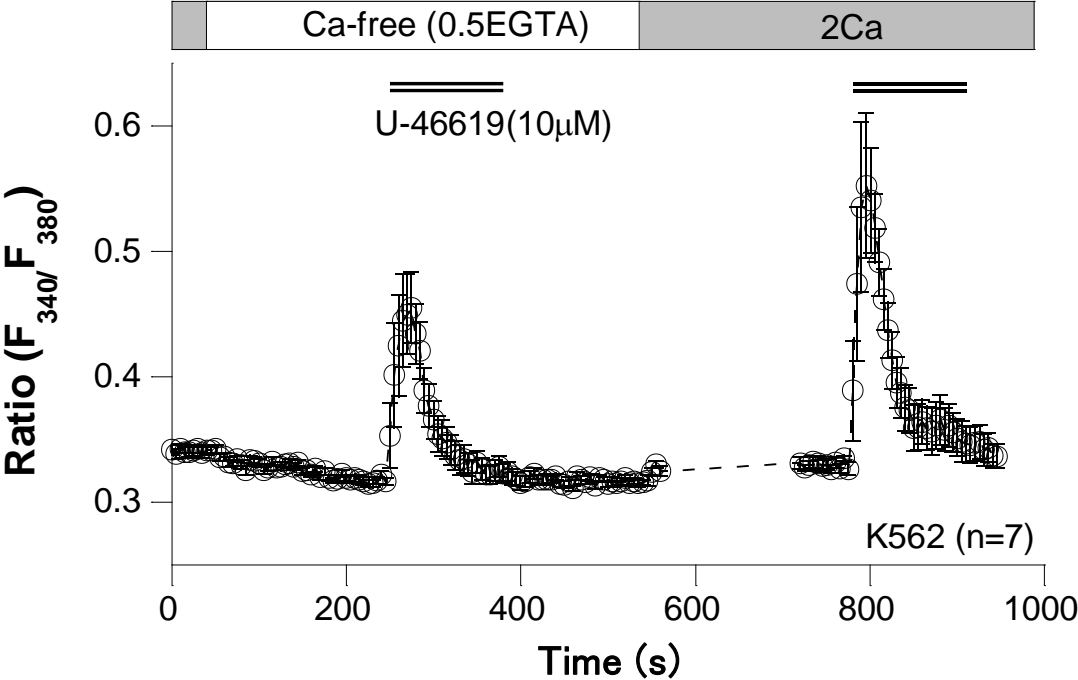

Supplement: Supplementary file 2 [file 1]
